# Supplementary material
Source: Springer Nature journal article supplement (https://www.springermedizin.de/resource/supplementary/12885_2012_3718_MOESM10_ESM.pdf/9465972)

**A**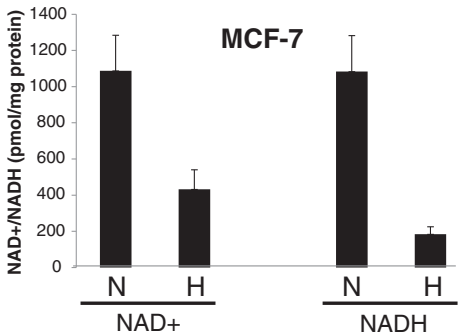**B**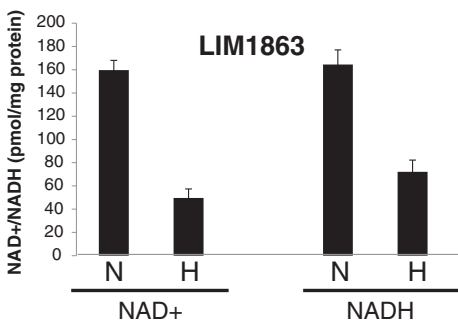**C**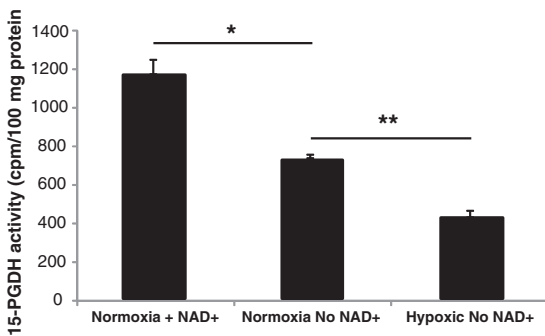

Supplement: MOESM10 [file 9465972]
